# Supplementary material for: Behaviourally mediated predation avoidance in penguin prey: in situ evidence from animal-borne camera loggers
Source: R Soc Open Sci. 2018 Aug 22;5(8):171449. doi: 10.1098/rsos.171449 (PMC6124084; doi:10.1098/rsos.171449)
Supplement: Instructions for supplementary data and video captions [file rsos171449supp1.docx]

**Supplementary material and Dryad repository (DOI: 10.5061/dryad.5247q) file instructions**

**Temporary Dryad link:** <http://datadryad.org/review?doi=doi:10.5061/dryad.5247q>

**Title**

Behaviourally mediated predation avoidance in penguin prey: *In situ* evidence from animal-borne camera loggers

Jonathan M Handley1, Andréa Thiebault1, Andrew Stanworth2, David Schutt3, Pierre Pistorius1

1DST/NRF Centre of Excellence at the FitzPatrick Institute of African Ornithology, Department of Zoology, Nelson Mandela University, South Campus, Port Elizabeth 6031, South Africa

*jonorow@gmail.com Tel: +27 (0)83 291 4690 Fax: +27 (0)41 504 2317

2Falklands Conservation, P.O. Box 26, Stanley FIQQ 1ZZ, Falkland Islands

3University of Colorado Denver, PO Box 173364 Denver, CO 80217 USA

The following files supplement the manuscript, “Behaviourally mediated predation avoidance in penguin prey: *In situ* evidence from animal-borne camera loggers”. The files are either linked directly to the paper, or are stored in a Dryad repository.

**Files linked directly to the paper:**

File: “Handley_RSOS_Supp Material_REVSIED.docx”

- Provides an overview of the analyses and directs users to necessary example files.

File: “Handley_RSOS_Behavioural Category Descriptors.csv:

- Excel document that contains descriptions about each behavioural category used in the below six files, and relevant to the study.

**Files available on the Dryad repository (DOI: https://doi.org/10.5061/dryad.5247q)**

File: “HandleyJM_GNP_CAM_Analysis.R”

- A synthesis of R code used to generate the results presented in the paper, including descriptions of all prey categories.

File: “GNP_FLK_CAM_PreyDetail.Rdata”

- R data file of the annotated camera data used for analyses in the paper

File: “P1_AnimalCam_SuppCode_Merge Trips.R” & “P2_AnimalCam_SuppCode_Feeding events.R”

- R scripts which require the other supplementary files:
  - SpeciesX_Location_2013_DepID21_1of3_Vid.csv
  - SpeciesX_Location_2013_DepID21_2of3_Vid.csv
  - SpeciesX_Location_2013_DepID21_3of3_Vid.csv
  - SpeciesX_Location_2013_DepID24_1of3_Vid.csv
  - SpeciesX_Location_2013_DepID24_2of3_Vid.csv
  - SpeciesX_Location_2013_DepID24_3of3_Vid.csv

File: “P3_AnimalCam_SuppCode_MergeCAMtoTDRandGPS.R”

- R script which gives example of how data from multiple devices can be merged, and requires the supplementary R files:
  - BR14_GNP_FLK_2013_CAM_SuppData.R
  - BR14_TDR_2013.14_GentooFI_ZOCdives.csv
  - BR14_2013-14_GentooFI_bf_track.csv

Short title and captions for movies S1-S4 which are provided in the supplementary material:

Movie S1:

Movie S1, Short title: General footage overview for gentoo penguins

Movie S1 Caption: General overview of footage obtained from animal-borne camera loggers attached to Gentoo penguins at the Falkland Islands. Examples include: Feeding on lobster krill, feeding on large fish, a full dive where the bird feeds on small fish then pursues and captures a squid, a full dive where lobster krill on the seafloor is ignored and unidentified prey items are shown, lobster krill on seafloor being predated upon, and foraging for small fish.

Movie S2:

Movie S2, Short title: Lobster krill defends against predation

Movie S2, Caption: Examples of lobster krill actively avoiding predation by gentoo penguins, by defending themselves with their pincers.

Movie S3:

Movie S3, Short title: Swarms of lobster krill

Movies S3, Caption: Examples of gentoo penguins not feeding and feeding off of large swarms of lobster krill.

Movie S4:

Movie S4, Short title: Intra and interspecific interactions

Movie S4, Caption: Examples of intra and interspecific interactions for gentoo penguins at the Falkland Islands.
